# Supplementary material for: Hybrid RF-Si Xerogels: A Cost-Effective Proposal for Insulator Materials
Source: MDPI journal article supplement (doi:10.3390/ma15010265), 2021-12-30
Supplement: s1 [file s1]

# Hybrid RF-Si xerogels: a cost-effective proposal for insulator materials

Samantha L. Flores-López<sup>1</sup>, Sara F. Villanueva<sup>1</sup>, Natalia Rey-Raap<sup>2\*</sup>, Ana Arenillas<sup>1\*</sup>

<sup>1</sup>Instituto de Ciencia y Tecnología del Carbono, INCAR-CSIC. Francisco Pintado Fe, 26. 33011 Oviedo, Spain

<sup>2</sup>Department of Physical and Analytical Chemistry, Oviedo University-CINN-CSIC, 33006-Oviedo, Spain

\*corresponding authors: aapunte@incar.csic.es, nataliarey@uniovi.es

## Supplementary Data

### S1. Synthesis conditions for hybrid materials

**Table S1.** Synthesis conditions used for hybrid samples.

| Sample         | Molar ratios |      |           |      |
|----------------|--------------|------|-----------|------|
|                | R/TEOS       | R/F  | EtOH/TEOS | D    |
| RF/Si-0.35-C   | 3            | 0.5  | 0         | 12.5 |
| RF/Si-0.40     | 6            | 0.3  | 0         | 7.4  |
| RF/Si-0.45-C   | 3            | 0.3  | 0         | 7.1  |
| RF/Si-0.45     | 3            | 0.3  | 0         | 12.9 |
| RF/Si-0.55-C   | 3            | 0.5  | 5         | 12.5 |
| RF/Si-0.55     | 3            | 0.3  | 0         | 7.1  |
| RF/Si-0.60-C   | 3            | 0.13 | 0         | 5.9  |
| RF/Si-0.85     | 3            | 0.5  | 5         | 12.5 |
| RF/Si-0.50-70% | 0.1          | 0.5  | 4.7       | 5.6  |

## S2. Synthesis of non-hybrid materials

Si xerogels were synthesized from the reagent concentrations in Table S1. TEOS, ethanol and water were mixed by adding them in this order while keeping magnetic stirring. The pH was adjusted with an ammonia solution 2M. Once the solution was homogeneous, 20mL of  $\text{NH}_4$  were added to favor the gelation. Samples were sealed and heated under MW radiation at 60°C for 2h to form the alcogel. Then, 250ml of EtOH were added and the sealed sample was maintained at 40°C in the MW oven for 4h to complete the curing step. Finally, the samples were dried at 30°C until constant weight.

Two different RF xerogels were prepared with the synthesis conditions shown in Table S1. The precursor solution was prepared by dissolving R in the quantity of water calculated from the D ratio. Then the corresponding amount of F was added, and the mixture was maintained in magnetic agitation to homogenize. The pH of the solution was adjusted with NaOH 1M to achieve a pH of 4.5. The synthesis process was performed under MW heating at 85°C for a total of 5h to ensure gelation and aging. Then the sample was completely dried in an electrical oven at 60°C overnight.

**Table S2.** Synthesis conditions used for non-hybrid samples.

| Material | Molar Ratios |           | pH  | MeOH Content (%) |
|----------|--------------|-----------|-----|------------------|
|          | R/F          | D         |     |                  |
| RF 45    | 0.13         | 6.2       | 4.5 | 10.0             |
| RF 55    | 0.60         | 4.6       | 4.5 | 12.5             |
| Material | Molar Ratios |           | pH  |                  |
|          | W/TEOS       | EtOH/TEOS |     |                  |
| Si 50    | 6            | 6         | 10  |                  |
| Si 70    | 2            | 6         | 10  |                  |

### S3. Porous and thermal properties of synthesized xerogels

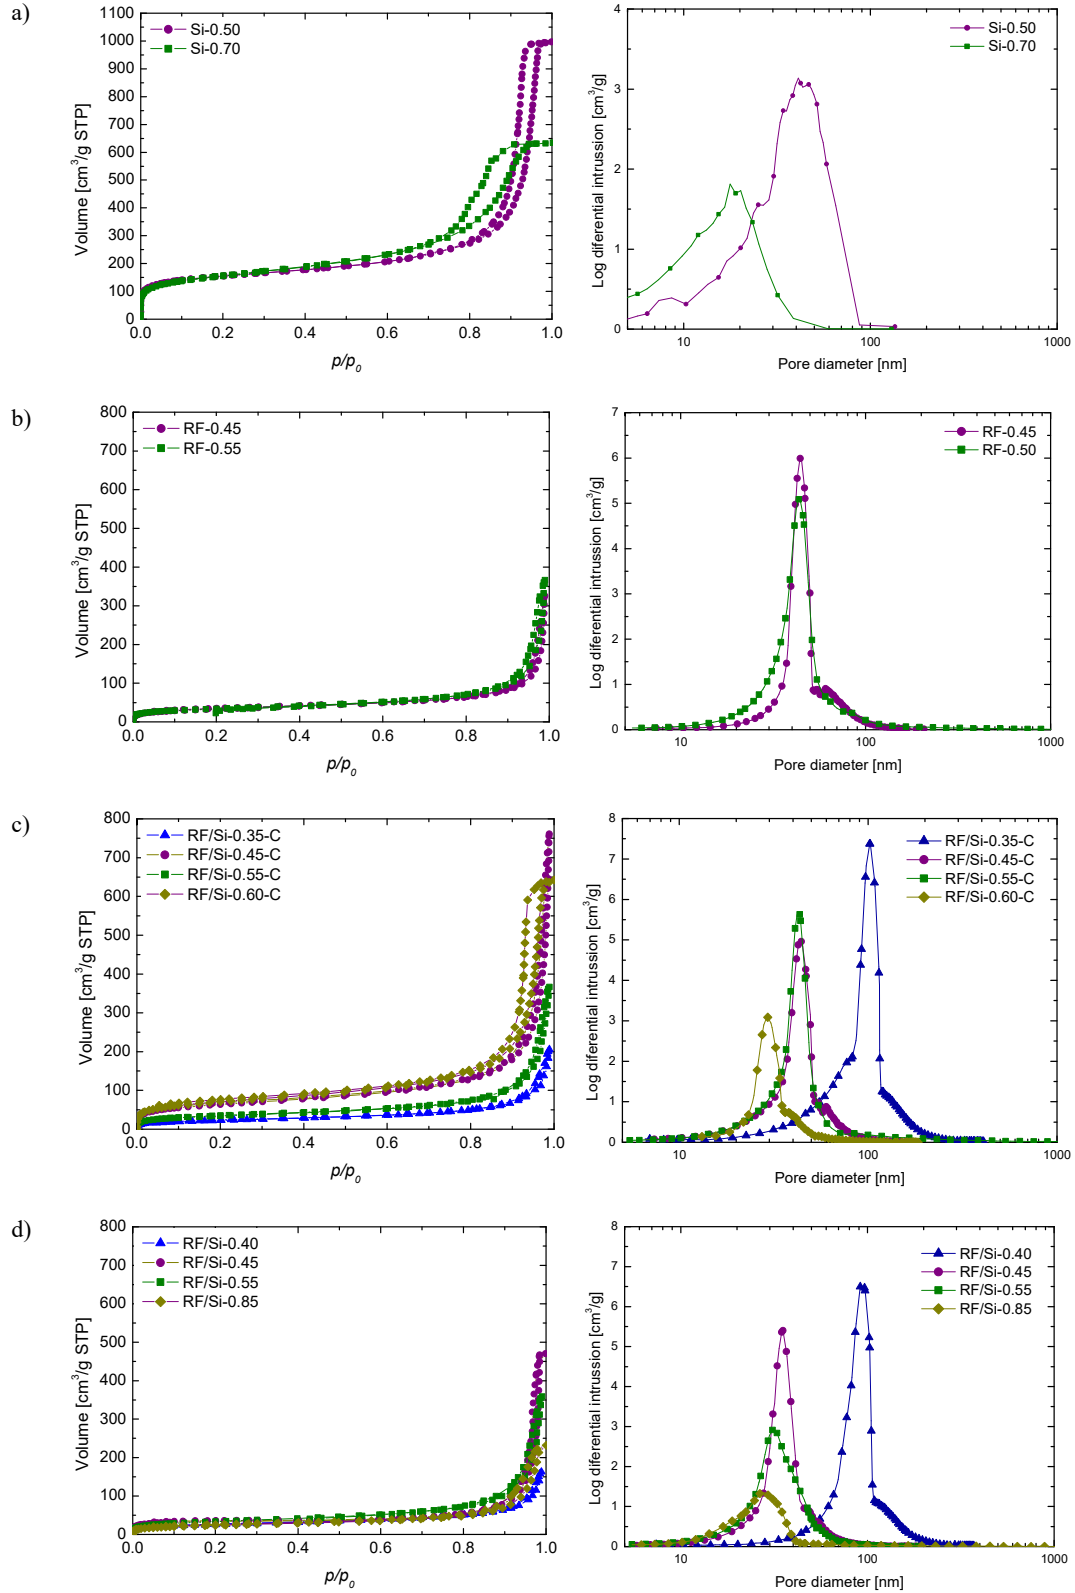

Figure S1. Isotherms and pore size distribution of xerogels samples.

**Table S3.** Thermal conductivity of hybrid xerogels.

| Sample         | Thermal conductivity |                      |
|----------------|----------------------|----------------------|
|                | 1-2mm<br>mW/mK       | 0.212-0.5mm<br>mW/mK |
| RF/Si-0.35-C   | 30                   | 25                   |
| RF/Si-0.40     | 30                   | 26                   |
| RF/Si-0.45-C   | 32                   | 30                   |
| RF/Si-0.45     | -                    | 30                   |
| RF/Si-0.55-C   | -                    | 36                   |
| RF/Si-0.55     | 41                   | 35                   |
| RF/Si-0.60-C   | 45                   | 40                   |
| RF/Si-0.85     | 66                   | 59                   |
| RF/Si-0.50-70% | -                    | 34                   |
